# Supplementary material for: What Enables Size-Selective Trophy Hunting of Wildlife?
Source: PLoS One. 2014 Aug 6;9(8):e103487. doi: 10.1371/journal.pone.0103487 (PMC4123890; doi:10.1371/journal.pone.0103487)
Supplement: Dataset S1 — (XLSX) [file pone.0103487.s001.xlsx]

## Sheet: Darimont & Child_Supplementay D
Dataset S1
What enables size-selective trophy hunting of wildlife?
id	hunter_age	prey_size	guided	rbm	camo
2	young	small	yes	small	no
4	old	small	yes	small	yes
5	old	small	yes	small	no
7	old	small	yes	small	no
8	young	large	yes	large	yes
9	young	small	yes	small	yes
11	old	small	yes	small	no
12	young	small	yes	small	no
13	young	small	yes	small	no
17	young	small	yes	small	no
21	young	small	yes	small	yes
22	old	small	yes	small	no
24	old	small	yes	small	yes
25	young	small	yes	small	yes
26	old	small	yes	small	yes
30	old	small	yes	small	yes
32	old	small	yes	small	yes
35	young	small	yes	small	yes
36	young	large	yes	small	no
38	young	small	yes	small	no
41	young	large	yes	small	no
47	young	small	yes	large	yes
48	old	small	yes	small	yes
49	young	small	yes	small	yes
51	old	small	yes	small	yes
52	young	small	yes	small	no
53	young	large	yes	small	yes
55	old	small	yes	small	no
56	young	small	yes	large	yes
57	young	small	yes	small	yes
58	old	small	yes	small	yes
63	old	small	yes	large	yes
64	old	small	yes	small	no
68	old	large	yes	large	no
69	old	small	yes	small	yes
72	young	small	yes	small	no
73	old	small	yes	small	yes
74	old	small	yes	small	yes
75	old	small	yes	small	yes
76	young	small	yes	small	yes
77	old	large	yes	small	yes
79	old	large	yes	large	yes
80	old	large	yes	small	yes
81	old	small	yes	small	no
82	old	small	yes	small	yes
83	old	large	yes	large	yes
89	old	small	yes	small	yes
90	old	small	yes	small	yes
91	old	small	yes	small	yes
93	old	large	yes	small	yes
95	old	small	yes	large	yes
99	young	small	yes	small	yes
101	old	small	yes	small	no
102	old	large	yes	large	no
104	young	small	yes	small	yes
105	old	small	yes	small	yes
106	old	small	yes	small	yes
107	young	small	yes	small	no
108	old	large	yes	small	no
109	old	large	yes	large	no
110	old	large	yes	small	yes
113	old	small	yes	small	yes
114	old	small	yes	small	no
116	old	small	yes	large	yes
118	young	large	yes	large	yes
119	young	small	yes	small	no
120	young	small	yes	small	no
122	old	small	yes	small	yes
123	young	small	yes	large	no
126	young	small	yes	small	no
128	old	large	yes	small	yes
129	old	small	yes	small	yes
130	old	small	yes	small	yes
132	old	small	yes	small	yes
134	old	large	yes	small	no
135	old	small	yes	small	yes
136	old	small	yes	small	yes
137	old	small	yes	small	yes
139	old	small	yes	small	yes
140	young	small	yes	small	yes
142	young	small	yes	small	yes
143	young	small	yes	small	yes
147	old	large	yes	small	yes
149	old	small	yes	small	yes
150	young	small	yes	small	yes
152	young	small	yes	small	yes
153	young	large	yes	large	yes
154	old	large	yes	small	yes
155	old	small	yes	small	yes
157	young	large	yes	small	yes
162	old	small	yes	large	yes
164	old	small	yes	small	yes
165	old	small	yes	small	no
166	old	small	yes	small	no
169	young	large	yes	small	yes
172	old	small	yes	small	yes
173	young	small	yes	small	yes
175	young	small	yes	small	yes
177	old	small	yes	large	yes
178	old	small	yes	large	no
179	old	large	yes	large	yes
180	old	small	yes	large	yes
181	old	small	yes	large	yes
183	old	small	yes	large	yes
184	old	large	yes	large	yes
185	old	small	yes	small	yes
186	young	large	yes	small	yes
187	old	small	yes	small	yes
188	young	small	no	small	yes
189	young	small	no	large	yes
192	young	small	no	small	yes
194	young	large	no	small	no
196	young	small	no	large	yes
197	young	small	no	small	no
198	young	small	no	large	yes
199	old	small	no	small	no
200	young	small	no	small	no
201	old	small	no	small	yes
206	old	small	no	small	yes
207	young	small	no	large	no
208	young	large	no	small	yes
209	old	small	no	small	yes
212	young	small	no	small	no
216	young	small	no	large	yes
218	young	large	no	small	no
220	young	small	no	small	yes
223	old	small	no	small	yes
224	young	small	no	large	no
227	young	small	no	small	yes
228	young	small	no	small	no
230	young	small	no	small	no
234	young	small	no	small	yes
241	young	small	no	small	no
243	young	small	no	small	yes
246	young	small	no	small	no
249	young	small	no	small	yes
250	young	small	no	small	yes
251	young	small	no	small	yes
252	old	small	no	small	yes
253	young	small	no	small	no
256	old	small	no	large	yes
257	old	small	no	small	no
264	old	large	no	small	no
266	young	small	no	small	yes
267	young	small	no	small	yes
268	young	small	no	small	no
269	young	small	no	small	yes
270	young	small	no	small	yes
271	young	small	no	small	yes
273	young	small	no	small	yes
274	young	small	no	small	no
275	young	large	no	large	no
276	young	small	no	small	yes
279	young	small	no	small	yes
281	young	small	no	small	yes
284	old	small	no	small	yes
286	young	small	no	small	no
296	young	small	no	small	yes
297	young	small	no	small	yes
312	young	small	no	small	yes
316	young	small	no	small	yes
319	young	small	no	small	yes
324	old	small	no	small	no
325	young	small	no	small	yes
332	old	small	no	small	no
333	young	small	no	small	yes
335	old	small	no	large	yes
342	young	small	no	small	no
345	young	small	no	small	yes
347	young	small	no	small	no
350	young	small	no	small	no
351	young	large	no	large	yes
352	old	small	no	small	no
354	old	small	no	large	yes
356	young	small	no	small	yes
358	young	small	no	small	yes
359	young	small	no	small	no
371	old	small	no	small	yes
372	old	small	no	small	yes
373	young	small	no	small	yes
374	young	small	no	large	yes
375	young	small	no	small	no
376	young	small	no	small	yes
378	old	small	no	large	yes
382	old	small	no	small	no
383	young	small	no	small	yes
386	young	small	no	small	yes
388	young	small	no	small	yes
389	young	small	no	small	no
390	young	small	no	large	no
392	young	small	no	small	yes
393	young	small	no	small	yes
394	young	small	no	small	yes
395	young	small	no	small	yes
396	young	small	no	small	no
397	young	large	no	small	no
399	young	small	no	large	yes
401	young	small	no	small	no
410	old	small	no	small	no
411	young	small	no	small	yes
413	old	small	no	small	yes
417	young	small	no	small	no
419	old	small	no	small	yes
423	young	large	no	small	no
425	young	small	no	small	no
426	young	small	no	small	no
431	old	small	no	small	yes
432	young	small	no	small	yes
433	old	small	no	small	yes
439	young	small	no	small	yes
440	old	small	no	small	yes
441	young	small	no	small	no
443	young	small	no	small	yes
448	old	small	no	small	yes
449	young	small	no	small	yes
451	old	small	no	small	yes
452	young	small	no	small	yes
453	young	small	no	small	no
454	young	small	no	small	yes
455	young	small	no	small	yes
457	young	small	no	small	yes
461	young	small	no	small	yes
463	young	small	no	small	yes
464	old	small	no	small	no
465	young	small	no	large	no
467	young	small	no	small	yes
469	young	small	no	small	no
470	old	small	no	small	yes
477	young	small	no	small	no
481	young	small	no	small	no
483	young	small	no	small	no
484	old	large	no	small	no
485	old	small	no	small	yes
486	young	small	no	small	yes
488	old	small	no	small	no
489	young	small	no	small	no
490	young	small	no	small	yes
491	young	small	no	small	yes
494	young	large	no	large	yes
495	old	small	no	small	yes
498	young	small	no	small	yes
499	young	small	no	small	yes
500	young	small	no	small	yes
501	young	small	no	large	yes
503	old	small	no	small	yes
510	young	small	no	small	yes
511	young	small	no	small	yes
512	old	small	no	small	yes
515	young	small	no	small	no
516	young	small	no	small	yes
517	young	small	no	small	yes
518	old	small	no	small	yes
519	young	small	no	small	yes
520	young	small	no	small	yes
521	young	small	no	small	yes
522	young	small	no	small	yes
523	old	small	no	small	yes
524	young	small	no	small	yes
525	young	small	no	small	yes
526	young	small	no	small	no
527	old	small	no	large	yes
528	old	small	no	small	no
532	young	large	no	small	no
533	young	small	no	large	yes
540	young	small	no	small	yes
545	young	small	no	small	yes
546	young	small	no	small	yes
547	young	small	no	small	yes
548	young	small	no	small	yes
550	young	small	no	small	yes
555	young	small	no	small	yes
558	young	small	no	small	no
559	young	small	no	large	yes
561	young	small	no	large	yes
563	young	small	no	small	no
565	old	small	no	small	yes
567	young	small	no	small	yes
570	young	small	no	small	yes
571	young	small	no	small	no
572	young	small	no	small	no
580	young	small	no	small	yes
584	young	small	no	small	yes
586	young	small	no	small	no
588	young	small	no	small	yes
589	young	small	no	small	yes
591	old	large	no	small	no
592	young	small	no	small	yes
593	young	small	no	small	no
597	young	small	no	small	no
598	young	small	no	small	no
601	young	small	no	small	no
602	young	small	no	small	no
606	young	small	no	small	yes
608	young	small	no	small	yes
611	young	small	no	small	yes
612	old	large	no	large	no
613	young	small	no	small	yes
615	young	small	no	small	yes
617	young	small	no	small	yes
618	young	small	no	large	no
620	young	small	no	small	yes
621	young	small	no	small	yes
622	young	small	no	small	yes
624	old	small	no	small	yes
628	young	small	no	large	yes
632	young	small	no	large	no
634	old	small	no	small	no
636	old	small	no	small	no
637	young	small	no	small	no
638	young	small	no	small	yes
639	young	small	no	large	yes
641	young	small	no	small	no
642	old	small	no	small	yes
643	old	small	no	small	yes
644	young	small	no	small	no
645	young	small	no	small	yes
646	young	small	no	large	yes
654	young	small	no	large	yes
655	young	small	no	small	yes
658	young	small	no	small	no
659	young	small	no	small	yes
660	young	small	no	small	no
665	young	small	no	large	no
666	young	small	no	small	yes
667	young	large	no	small	no
671	young	small	no	small	yes
672	young	small	no	small	yes
674	young	small	no	small	yes
675	old	small	no	small	no
681	young	small	no	small	yes
686	young	small	no	small	yes
694	young	small	no	small	yes
698	old	small	no	small	yes
701	young	small	no	small	yes
702	young	large	no	large	yes
703	young	small	no	small	yes
705	young	small	no	small	no
706	young	small	no	small	yes
707	young	small	no	small	yes
710	old	small	no	large	yes
711	young	small	no	small	no
714	young	small	no	small	no
720	young	small	no	small	no
722	young	large	no	small	yes
723	young	large	no	small	yes
724	young	small	no	small	yes
726	young	small	no	small	yes
728	old	small	no	small	yes
729	young	small	no	large	yes
730	young	small	no	small	yes
731	old	small	no	small	yes
734	young	small	no	small	no
738	young	small	no	small	yes
740	young	small	no	small	yes
745	old	large	no	small	yes
747	young	small	no	small	no
753	young	small	no	small	yes
754	young	small	no	small	yes
756	young	small	no	large	yes
757	young	small	no	small	no
758	old	large	no	large	no
759	young	small	no	small	no
761	young	large	no	small	yes
763	old	small	no	large	yes
765	young	small	no	small	no
766	young	small	no	small	no
767	young	small	no	large	yes
769	young	small	no	small	yes
770	old	small	no	small	yes
771	young	large	no	small	yes
772	old	large	no	large	yes
773	young	small	no	small	yes
776	young	small	no	small	no
778	young	small	no	small	yes
780	old	small	no	large	yes
781	young	small	no	small	yes
782	young	small	no	small	yes
783	young	small	no	small	yes
784	young	small	no	small	yes
785	young	small	no	small	yes
787	young	small	no	small	no
789	young	small	no	small	no
790	young	small	no	small	yes
791	young	large	no	small	no
793	young	small	no	small	yes
799	young	small	no	small	no
800	young	small	no	small	no
802	old	small	no	small	no
804	young	small	no	small	yes
806	young	large	no	large	yes
807	young	small	no	small	yes
808	young	small	no	small	no
809	young	small	no	small	yes
810	young	small	no	small	yes
811	young	small	no	large	no
812	young	small	no	large	yes
813	young	small	no	large	yes
815	young	small	no	small	yes
819	old	small	no	small	no
820	young	large	no	small	yes
821	old	small	no	small	yes
822	young	small	no	small	yes
823	young	small	no	large	yes
824	old	small	no	small	yes
825	young	small	no	small	yes
827	young	small	no	large	yes
831	young	small	no	large	yes
835	young	small	no	small	yes
837	young	small	no	small	yes
838	young	large	no	small	no
839	old	small	no	small	yes
841	young	small	no	small	yes
842	young	small	no	small	no
844	young	small	no	small	yes
845	young	small	no	large	yes
846	young	small	no	large	no
847	young	small	no	small	yes
849	young	small	no	large	yes
853	young	small	no	small	no
855	old	small	no	small	yes
859	old	small	no	small	yes
862	old	small	no	large	no
863	young	small	no	small	no
866	young	small	no	small	no
869	young	small	no	small	yes
870	young	small	no	small	yes
876	young	small	no	small	yes
880	young	large	no	small	yes
882	young	small	no	small	yes
883	young	small	no	small	yes
884	young	small	no	small	yes
887	young	small	no	small	yes
890	young	small	no	small	yes
891	young	small	no	small	no
892	young	small	no	small	yes
896	young	small	no	small	no
897	young	small	no	small	yes
898	old	small	no	large	yes
899	young	large	no	small	yes
900	old	large	no	small	yes
901	young	small	no	small	yes
902	young	small	no	small	yes
904	young	small	no	small	no
905	young	small	no	small	no
906	young	small	no	small	yes
907	young	small	no	small	yes
908	young	large	no	small	yes
909	young	small	no	small	no
911	young	small	no	small	no
913	young	small	no	small	yes
914	young	small	no	small	no
919	young	small	no	small	yes
920	young	small	no	small	yes
922	young	small	no	small	no
924	young	small	no	small	yes
925	old	small	no	small	no
926	young	small	no	small	yes
927	young	small	no	small	yes
928	young	small	no	small	no
931	young	small	no	small	yes
933	young	small	no	small	no
934	young	small	no	small	yes
935	young	large	no	small	yes
936	young	small	no	small	yes
937	young	small	no	small	no
938	young	small	no	small	yes
940	young	small	no	small	yes
941	young	small	no	small	yes
944	young	small	no	small	yes
945	young	small	no	small	yes
946	old	small	no	small	yes
947	young	small	no	small	no
951	young	small	no	small	yes
952	young	small	no	small	no
953	young	small	no	small	no
957	young	small	no	small	yes
959	young	small	no	small	yes
961	young	small	no	small	no
962	young	small	no	small	yes
963	young	small	no	small	yes
964	young	small	no	small	yes
965	young	small	no	small	yes
966	young	small	no	small	yes
968	young	large	no	small	yes
970	young	large	no	large	yes
972	young	small	no	small	yes
974	young	large	no	small	no
975	young	small	no	small	yes
976	young	small	no	large	no
977	young	small	no	small	no
979	old	small	no	small	yes
981	young	small	no	small	no
982	young	small	no	small	no
987	young	small	no	large	yes
994	old	small	no	small	yes
995	young	small	no	small	yes
997	young	small	no	small	yes
998	young	small	no	small	yes
999	young	small	no	small	no
1000	young	small	no	small	yes
1001	young	small	yes	small	yes
1002	young	small	yes	large	no
1003	young	small	yes	small	yes
1004	young	large	yes	small	no
1006	young	large	yes	large	no
1007	young	small	yes	small	yes
1008	old	small	yes	small	yes
1009	young	small	yes	small	yes
1010	young	small	yes	large	yes
1011	old	large	yes	small	yes
1012	old	small	yes	small	yes
1013	young	small	yes	small	no
1014	old	small	yes	small	yes
1015	old	small	yes	small	yes
1016	old	large	yes	small	yes
1017	old	small	yes	small	no
1018	young	small	yes	small	yes
1019	old	large	yes	small	no
1020	old	large	yes	small	yes
1021	old	small	yes	large	yes
1022	old	small	yes	small	no
1023	old	large	yes	small	yes
1024	young	small	yes	large	yes
1025	young	large	yes	small	yes
1026	old	large	yes	large	yes
1027	old	small	yes	small	yes
1028	young	small	yes	small	yes
1029	old	small	yes	large	yes
1031	young	small	yes	small	yes
1032	old	small	yes	small	no
1033	old	large	yes	large	yes
1034	old	small	yes	small	yes
1036	old	small	yes	large	no
1037	old	small	yes	small	yes
1038	old	small	yes	small	yes
1039	young	large	yes	small	yes
1040	young	large	yes	small	yes
1041	old	large	yes	large	yes
1042	old	small	yes	small	yes
1046	young	large	yes	small	yes
1047	young	small	yes	small	yes
1048	young	large	yes	small	yes
1050	young	large	yes	small	yes
1051	young	large	yes	small	yes
1052	old	large	yes	small	yes
1054	old	large	yes	small	yes
1055	young	small	yes	large	yes
1056	young	large	yes	small	yes
1057	young	small	yes	large	yes
1059	young	small	yes	small	yes
1061	young	small	yes	small	yes
1062	old	small	yes	small	no
1063	young	small	yes	small	yes
1065	young	small	yes	small	yes
1066	young	small	yes	large	yes
1067	young	small	yes	small	yes
1068	old	small	yes	large	yes
1069	young	large	yes	large	yes
1071	old	small	yes	small	yes
1073	young	small	yes	small	no
1074	old	small	yes	large	yes
1075	old	small	yes	small	no
1076	old	small	yes	large	yes
1077	young	small	yes	large	yes
1078	old	small	yes	small	yes
1079	young	small	yes	small	no
1080	young	small	yes	small	yes
1081	young	small	yes	small	yes
1083	old	large	yes	small	yes
1084	old	small	yes	large	yes
1085	old	small	yes	small	no
1086	young	small	yes	small	no
1087	young	large	yes	small	yes
1088	old	small	yes	large	yes
1089	old	large	yes	small	yes
1090	young	small	yes	large	no
1091	old	large	yes	small	no
1092	old	large	yes	small	no
1093	young	small	yes	small	no
1094	old	small	yes	small	no
1095	young	large	yes	small	no
1096	young	small	yes	small	no
1097	young	small	yes	small	yes
1098	young	large	yes	small	yes
1099	old	small	yes	large	yes
1101	young	large	yes	small	yes
1102	young	small	yes	small	yes
1103	young	small	yes	large	no
1104	young	small	yes	small	yes
1105	young	small	yes	small	no
1106	old	small	yes	small	no
1108	young	large	yes	large	no
1109	old	small	yes	large	yes
1110	young	small	yes	small	yes
1111	old	large	yes	small	no
1113	old	small	yes	small	no
1114	young	small	yes	small	yes
1115	old	small	yes	small	yes
1116	young	small	yes	small	yes
1117	young	small	yes	small	yes
1119	young	small	yes	small	yes
1120	old	small	yes	small	yes
1122	young	small	yes	large	yes
1123	old	small	yes	small	yes
1124	young	small	yes	small	yes
1126	young	small	yes	small	yes
1127	old	small	yes	small	yes
1129	young	large	yes	large	yes
1130	old	small	yes	small	yes
1131	young	small	yes	large	yes
1132	young	small	yes	small	yes
1133	old	large	yes	small	yes
1134	young	small	yes	small	yes
1136	old	small	yes	small	yes
1137	young	small	yes	small	yes
1138	young	large	yes	small	yes
1139	old	small	yes	large	yes
1140	old	small	yes	small	yes
1141	young	small	yes	large	yes
1142	young	small	yes	small	yes
1143	young	small	yes	small	no
1144	young	small	yes	small	yes
1145	young	large	yes	small	yes
1146	old	small	yes	small	yes
1147	young	small	yes	small	yes
1148	young	large	yes	small	yes
1149	old	small	yes	small	yes
1150	young	large	yes	large	yes
1151	old	small	yes	small	no
1153	old	large	yes	large	yes
1154	old	small	yes	small	yes
1155	old	small	yes	small	yes
1156	old	small	yes	small	yes
1159	young	small	yes	large	yes
1160	young	small	yes	small	yes
1161	young	small	yes	small	yes
1164	old	large	yes	large	yes
1165	old	small	yes	large	yes
1167	young	small	yes	small	yes
1168	young	small	yes	small	yes
1169	young	small	yes	small	yes
1171	old	large	yes	small	yes
1172	young	small	yes	small	yes
1175	young	large	yes	small	yes
1176	young	small	yes	small	yes
1177	young	small	yes	small	yes
1178	old	small	yes	large	yes
1179	young	large	yes	small	yes
1180	old	large	yes	small	yes
1182	young	small	yes	small	yes
1183	young	small	yes	large	yes
1184	old	small	yes	small	yes
1185	old	small	yes	small	yes
1186	young	large	yes	small	yes
1187	young	large	yes	large	no
1188	old	small	yes	small	yes
1189	old	small	yes	small	yes
1190	young	large	yes	small	yes
1191	old	large	yes	large	yes
1193	young	small	yes	large	yes
1194	young	small	yes	small	no
1196	old	large	yes	large	yes
1197	young	large	yes	small	yes
1198	old	small	yes	small	yes
1200	old	large	yes	small	yes
1201	young	large	yes	large	yes
1202	young	small	yes	small	yes
1203	young	small	yes	large	no
1204	old	large	yes	large	yes
1205	young	small	yes	small	no
1206	old	small	yes	small	yes
1207	young	small	yes	small	yes
1208	young	small	yes	large	no
1209	young	large	yes	small	no
1210	young	small	yes	small	yes
1211	young	small	yes	small	yes
1212	young	small	yes	small	yes
1214	young	small	yes	small	no
1215	young	small	yes	small	no
1216	young	small	yes	large	yes
1217	young	small	yes	large	yes
1218	old	small	yes	small	yes
1219	old	small	yes	large	no
1220	old	large	yes	small	yes
1223	young	small	yes	large	yes
1224	young	small	yes	small	yes
1225	old	small	yes	small	yes
1226	young	small	yes	small	no
1227	old	large	yes	large	yes
1228	young	large	yes	small	no
1229	old	large	yes	large	yes
1231	old	small	yes	small	yes
1232	old	large	yes	small	yes
1233	young	small	yes	small	no
1234	old	small	yes	small	yes
1235	old	large	yes	small	yes
1236	young	small	yes	large	yes
1237	young	small	yes	small	yes
1238	old	small	yes	large	no
1239	old	small	yes	large	yes
1240	young	large	yes	large	yes
1241	old	small	yes	small	yes
1242	old	large	yes	small	yes
1244	young	small	yes	small	no
1245	young	small	yes	large	yes
1246	young	small	yes	large	yes
1248	old	small	yes	large	yes
1249	young	small	yes	small	no
1250	old	small	yes	small	yes
1251	old	small	yes	small	no
1254	old	small	yes	small	yes
1255	young	small	yes	large	yes
1256	young	small	yes	small	yes
1257	young	small	yes	small	yes
1258	young	small	yes	small	yes
1259	young	small	yes	small	yes
1261	young	small	yes	small	yes
1262	old	small	yes	small	yes
1263	old	small	yes	large	yes
1264	young	small	yes	large	yes
1265	old	large	yes	large	yes
1266	old	small	yes	small	yes
1267	old	small	yes	large	no
1268	young	small	yes	large	no
1269	old	small	yes	small	yes
1270	young	small	yes	small	no
1271	young	small	yes	large	yes
1272	old	large	yes	small	yes
1273	young	small	yes	large	yes
1274	young	small	yes	small	yes
1275	old	small	yes	large	yes
1276	old	small	yes	large	yes
1277	young	large	yes	small	yes
1278	young	large	yes	small	yes
1279	old	small	yes	small	no
1280	old	large	yes	small	no
1282	old	large	yes	small	yes
1283	old	small	yes	large	yes
1284	old	small	yes	small	no
1286	young	small	yes	large	no
1287	young	small	yes	large	no
1288	young	small	yes	large	yes
1289	young	large	yes	large	yes
1290	young	small	yes	large	yes
1292	old	small	yes	small	yes
1294	young	small	yes	small	yes
1295	old	small	yes	small	yes
1296	young	small	yes	small	yes
1299	old	small	yes	small	no
1300	young	small	yes	small	yes
1302	old	small	yes	small	yes
1303	old	small	yes	small	yes
1304	young	large	yes	small	no
1305	young	small	yes	large	yes
1306	young	small	yes	large	yes
1307	young	small	yes	small	no
1308	young	small	yes	small	yes
1309	young	large	yes	small	yes
1310	old	small	yes	small	yes
1311	young	small	yes	small	yes
1313	young	large	yes	small	yes
1314	young	small	yes	small	yes
1315	young	small	yes	large	no
1316	old	small	yes	small	yes
1317	old	small	yes	small	no
1320	young	small	yes	small	yes
1322	old	small	yes	small	yes
1323	old	large	yes	small	yes
1324	young	large	yes	small	yes
1325	old	small	yes	small	yes
1326	young	small	yes	small	yes
1327	old	large	yes	small	yes
1328	old	small	yes	small	yes
1329	old	small	yes	small	yes
1330	young	small	yes	small	yes
1331	old	small	yes	small	yes
1332	young	small	yes	small	yes
1333	old	small	yes	small	no
1335	young	small	yes	large	no
1336	old	large	yes	large	yes
1337	old	small	yes	small	yes
1338	old	small	yes	small	yes
1340	young	large	yes	small	yes
1341	old	large	yes	small	yes
1343	young	small	yes	small	yes
1345	young	small	yes	small	yes
1346	young	large	yes	small	yes
1347	young	small	yes	small	yes
1348	young	large	yes	small	no
1349	young	small	yes	small	yes
1351	young	small	yes	small	no
1353	young	small	yes	large	yes
1354	old	large	yes	small	yes
1355	old	large	yes	small	yes
1356	young	small	yes	large	yes
1358	old	small	yes	small	no
1359	young	large	yes	large	yes
1360	young	small	yes	small	no
1362	young	large	yes	small	yes
1363	old	small	yes	small	yes
1364	young	large	yes	large	yes
1365	young	small	yes	small	yes
1366	young	small	yes	small	yes
1367	old	small	yes	small	yes
1369	young	small	yes	large	yes
1372	young	small	yes	small	yes
1373	young	small	yes	small	yes
1374	young	small	yes	small	no
1375	young	small	yes	small	yes
1377	young	small	yes	large	yes
1378	young	large	yes	small	yes
1379	old	small	yes	large	yes
1380	young	small	yes	small	yes
1381	young	small	yes	large	yes
1382	young	small	yes	small	no
1383	old	small	yes	small	yes
1384	young	small	yes	small	yes
1385	young	small	yes	small	no
1386	old	small	yes	large	no
1387	young	small	yes	small	no
1388	old	small	yes	small	yes
1390	young	large	yes	small	yes
1391	young	small	yes	small	no
1392	young	small	yes	small	no
1393	young	small	yes	small	yes
1394	young	small	yes	small	yes
1395	young	small	yes	small	no
1396	young	small	yes	small	no
1397	young	large	yes	small	yes
1399	young	small	yes	small	yes
1400	young	small	yes	small	no
1401	old	large	yes	small	yes
1403	old	small	yes	large	yes
1404	young	small	yes	small	yes
1405	old	small	yes	small	yes
1406	old	small	yes	small	yes
1407	old	small	yes	small	yes
1408	old	small	yes	small	no
1409	young	large	yes	large	yes
1410	young	small	yes	small	yes
1412	old	small	yes	small	yes
1413	young	small	yes	small	yes
1414	old	small	yes	small	yes
1415	young	small	yes	small	no
1416	young	small	yes	small	yes
1417	young	small	yes	large	yes
1418	young	small	yes	large	yes
1419	old	small	yes	small	yes
1420	young	small	yes	small	yes
1421	old	small	yes	small	yes
1422	old	small	yes	large	yes
1423	old	small	yes	small	yes
1424	old	large	yes	small	yes
1425	old	small	yes	small	yes
1427	old	small	yes	small	yes
1429	old	small	yes	small	yes
1430	young	small	yes	small	yes
1431	young	small	yes	small	yes
1432	old	small	yes	large	yes
1433	old	small	yes	small	yes
1434	young	large	yes	small	no
1435	young	small	yes	small	yes
1436	young	small	yes	small	yes
1437	young	large	yes	large	yes
1438	young	small	yes	small	yes
1439	young	small	yes	small	yes
1440	young	small	yes	small	yes
1441	young	large	yes	large	yes
1442	young	small	yes	large	yes
1444	old	small	yes	large	yes
1446	young	small	yes	small	no
1447	young	small	yes	small	yes
1448	old	small	yes	large	yes
1449	old	small	yes	large	yes
1450	young	small	yes	small	no
1451	young	small	yes	small	no
1452	young	small	yes	small	yes
1453	young	small	yes	small	yes
1454	young	small	yes	large	yes
1455	old	small	yes	small	yes
1456	old	large	yes	small	yes
1457	old	small	yes	large	yes
1458	young	small	yes	large	yes
1459	young	small	yes	small	no
1460	young	small	yes	large	no
1461	young	large	yes	small	yes
1462	old	large	yes	small	yes
1463	old	small	yes	small	yes
1464	old	small	yes	small	yes
1465	young	small	yes	large	yes
1466	old	small	yes	small	yes
1467	young	small	yes	small	yes
1468	young	large	yes	small	yes
1469	young	small	yes	small	yes
1470	young	small	yes	small	yes
1471	old	small	yes	small	yes
1472	young	small	yes	small	yes
1473	young	large	yes	small	yes
1475	young	large	yes	small	yes
1476	young	small	yes	small	yes
1477	young	large	yes	small	yes
1478	young	small	yes	small	no
1479	old	small	yes	small	no
1481	young	small	yes	large	no
1482	young	large	yes	small	yes
1483	young	small	yes	small	yes
1485	young	large	yes	small	yes
1486	young	small	yes	small	no
1487	young	small	yes	small	yes
1488	old	small	yes	small	no
1489	old	small	yes	small	yes
1490	young	small	yes	small	yes
1491	young	small	yes	large	yes
1492	young	small	yes	small	yes
1493	old	small	yes	small	yes
1494	young	small	yes	large	yes
1496	young	small	yes	small	yes
1497	young	small	yes	large	yes
1499	old	small	yes	small	no
1500	young	large	yes	small	yes
1501	old	small	yes	small	no
1502	young	small	yes	small	no
1504	young	small	yes	small	no
1505	young	small	yes	large	yes
1506	young	small	yes	large	yes
1507	young	small	yes	small	yes
1510	old	small	yes	small	yes
1511	young	small	yes	small	yes
1512	old	small	yes	small	yes
1513	young	large	yes	large	yes
1514	young	small	yes	small	yes
1515	young	small	yes	small	yes
1518	young	small	yes	small	yes
1519	young	small	yes	small	yes
1520	old	small	yes	small	yes
1521	young	small	yes	small	yes
1522	old	small	yes	small	yes
1524	young	small	yes	large	no
1525	young	small	yes	small	yes
1526	young	small	yes	small	yes
1527	old	small	yes	small	yes
1528	old	small	yes	small	yes
1530	young	small	yes	small	no
1532	old	small	yes	small	yes
1533	young	small	yes	small	yes
1534	old	small	yes	small	yes
1536	old	small	yes	large	yes
1537	young	small	yes	large	yes
1540	old	large	yes	small	yes
1541	young	small	yes	small	no
1542	young	small	yes	large	no
1543	young	large	yes	small	no
1544	young	small	yes	small	no
1545	young	small	yes	small	yes
1547	old	small	yes	small	yes
1548	old	small	yes	small	yes
1549	young	small	yes	small	yes
1550	old	small	yes	small	yes
1551	old	small	yes	small	yes
1552	young	large	yes	small	yes
1553	young	small	yes	large	yes
1554	young	small	yes	small	no
1555	old	small	yes	large	yes
1556	young	small	yes	small	yes
1557	old	small	yes	small	yes
1558	old	large	yes	small	yes
1559	young	small	yes	small	yes
1560	young	small	yes	small	yes
1562	young	large	yes	small	yes
1563	old	small	yes	small	yes
1565	old	large	yes	small	yes
1566	old	large	yes	small	yes
1568	old	large	yes	small	yes
1570	young	small	yes	small	no
1571	old	small	yes	small	yes
1572	young	small	yes	large	yes
1573	young	large	yes	small	yes
1574	young	large	yes	small	yes
1575	young	small	yes	small	yes
1576	young	small	yes	small	yes
1577	old	large	yes	small	yes
1578	old	large	yes	small	yes
1579	old	large	yes	small	no
1580	young	large	yes	small	yes
1581	young	small	yes	small	yes
1582	young	small	yes	small	yes
1583	young	large	yes	small	yes
1585	young	small	yes	small	yes
1587	young	small	yes	small	yes
1589	young	small	yes	small	yes
1590	old	large	yes	large	yes
1591	young	large	yes	small	yes
1592	young	small	yes	small	yes
1595	old	small	yes	small	yes
1596	young	large	yes	large	yes
1597	young	large	yes	large	yes
1598	young	small	yes	small	yes
1599	young	small	yes	small	yes
1600	old	large	yes	small	yes
1601	young	small	yes	small	yes
1602	young	large	yes	small	yes
1603	young	large	yes	small	yes
1604	young	large	yes	small	yes
1605	old	large	yes	small	yes
1606	old	large	yes	small	yes
1607	young	small	yes	small	yes
1608	young	small	yes	small	yes
1609	old	large	yes	large	yes
1610	young	small	yes	small	yes
1611	old	large	yes	small	yes
1612	young	small	yes	small	yes
1613	old	large	yes	small	yes
1614	old	large	yes	small	yes
1615	old	small	yes	large	yes
1616	young	small	yes	small	yes
1617	old	small	yes	small	yes
1618	young	large	yes	large	yes
1619	old	small	yes	small	yes
1620	old	small	yes	small	yes
1621	old	large	yes	small	no
1622	old	small	yes	small	yes
1623	young	small	yes	small	yes
1624	young	small	yes	small	yes
1625	young	large	yes	small	no
1626	young	large	yes	small	yes
1627	young	large	yes	small	yes
1630	young	small	yes	large	yes
1632	young	large	yes	small	yes
1634	old	small	yes	small	yes
1635	old	small	yes	small	yes
1636	young	large	yes	small	yes
1637	old	large	yes	small	yes
1638	old	large	yes	small	yes
1639	young	small	yes	small	yes
1640	young	small	yes	small	yes
1641	young	small	yes	small	yes
1642	young	small	yes	small	yes
1643	old	large	yes	large	yes
1644	old	large	yes	large	yes
1645	young	large	yes	small	yes
1647	young	small	yes	small	yes
1649	young	small	yes	large	yes
1650	young	small	yes	large	yes
1651	young	small	yes	small	yes
1653	old	large	yes	large	yes
1654	old	large	yes	large	no
1655	old	small	yes	small	yes
1656	old	small	yes	small	no
1659	old	small	yes	small	no
1660	young	small	yes	small	no
1661	old	small	yes	large	yes
1662	old	large	yes	small	yes
1663	young	small	yes	small	yes
1664	old	small	yes	small	yes
1665	old	large	yes	small	yes
1666	old	small	yes	small	yes
1667	old	small	yes	small	yes
1668	old	small	yes	large	yes
1669	young	small	yes	small	yes
1670	young	small	yes	large	yes
1671	old	small	yes	small	yes
1673	young	small	yes	small	yes
1674	young	small	yes	small	yes
1675	old	small	yes	large	yes
1676	old	large	yes	small	yes
1677	young	small	yes	large	no
1678	old	small	yes	small	no
1679	young	small	yes	large	yes
1680	old	small	yes	small	yes
1681	old	large	yes	small	yes
1682	old	small	yes	large	yes
1683	old	large	yes	large	yes
1684	young	small	yes	small	yes
1685	old	small	yes	small	yes
1686	old	small	yes	large	yes
1687	young	large	yes	large	yes
1688	old	small	yes	small	yes
1689	old	small	yes	small	yes
1690	old	small	yes	small	yes
1691	old	small	yes	large	yes
1692	old	small	yes	large	yes
1693	old	small	yes	large	yes
1694	young	large	yes	small	yes
1695	young	small	yes	small	yes
1697	young	small	yes	large	no
1698	young	small	yes	small	yes
1699	young	small	yes	small	yes
1700	young	large	yes	small	yes
1702	old	small	yes	small	no
1703	young	small	yes	large	yes
1704	young	small	yes	small	no
1705	old	large	yes	large	no
1706	young	large	yes	small	yes
1708	old	small	yes	small	no
1709	old	small	yes	small	yes
1710	old	small	yes	large	yes
1711	young	small	yes	small	yes
1712	young	small	yes	small	yes
1713	old	small	yes	small	yes
1714	old	small	yes	small	yes
1715	young	small	yes	large	yes
1717	young	large	yes	small	yes
1719	young	small	yes	small	no
1720	young	small	yes	small	no
1722	young	small	yes	small	yes
1724	young	large	yes	small	yes
1725	young	small	yes	small	yes
1726	old	small	yes	small	no
1727	old	small	yes	small	yes
1728	young	small	yes	small	yes
1729	young	small	yes	large	yes
1730	young	small	yes	small	yes
1731	young	small	yes	small	yes
1732	young	small	yes	large	yes
1733	old	small	yes	small	no
1734	young	small	yes	small	yes
1735	young	large	yes	small	yes
1736	young	small	yes	small	yes
1737	young	small	yes	small	yes
1738	young	small	yes	small	yes
1739	young	small	yes	large	yes
1741	young	large	yes	small	yes
1742	young	small	yes	small	yes
1743	young	large	yes	small	yes
1744	young	small	yes	small	yes
1745	young	small	yes	small	yes
1746	young	large	yes	small	yes
1747	young	large	yes	small	yes
1748	old	large	yes	small	no
1750	young	small	yes	small	yes
1751	old	small	yes	small	yes
1752	young	small	yes	small	yes
1753	old	large	yes	small	yes
1754	old	small	yes	small	yes
1755	young	small	yes	small	yes
1756	young	large	yes	small	yes
1757	old	large	yes	small	yes
1758	old	small	yes	small	yes
1759	young	small	yes	small	yes
1760	young	small	yes	small	yes
1761	young	large	yes	small	no
1762	old	small	yes	small	yes
1763	old	large	yes	large	yes
1764	young	large	yes	small	yes
1765	young	small	yes	small	yes
1766	young	small	yes	small	no
1767	young	small	yes	small	yes
1768	old	large	yes	small	no
1769	young	small	yes	small	yes
1770	young	large	yes	small	yes
1771	old	large	yes	small	yes
1772	old	small	yes	small	yes
1773	old	small	yes	small	yes
1774	old	small	yes	large	yes
1775	old	small	yes	small	yes
1776	old	small	yes	large	yes
1778	young	small	yes	small	yes
1779	young	small	yes	small	no
1780	young	large	yes	small	yes
1781	old	large	yes	large	no
1782	young	small	yes	small	yes
1783	old	small	yes	small	yes
1784	young	small	yes	small	yes
1785	young	large	yes	large	yes
1786	young	large	yes	small	yes
1787	young	small	yes	small	yes
1788	young	small	yes	small	yes
1789	old	small	yes	large	yes
1790	young	small	yes	large	yes
1792	old	small	yes	small	yes
1793	young	small	yes	small	yes
1794	old	large	yes	small	yes
1795	young	small	yes	large	no
1796	young	small	yes	small	yes
1797	young	small	yes	small	yes
1799	old	large	yes	small	yes
1800	old	large	yes	small	yes
1801	old	large	yes	large	yes
1802	young	small	yes	small	yes
1803	young	large	yes	small	yes
1804	old	small	yes	small	yes
1805	old	small	yes	small	yes
1806	young	small	yes	small	yes
1807	old	large	yes	small	yes
1808	young	large	yes	large	yes
1809	young	large	yes	small	yes
1810	old	large	yes	small	no
1811	young	large	yes	small	yes
1812	young	large	yes	large	yes
1813	young	large	yes	large	yes
1814	young	large	yes	small	yes
1815	old	small	yes	small	no
1816	young	small	yes	small	yes
1817	young	small	yes	large	yes
1818	old	large	yes	large	yes
1819	young	small	yes	small	yes
1820	old	small	yes	small	yes
1821	young	small	yes	large	yes
1822	young	small	yes	small	yes
1823	young	small	yes	small	yes
1824	young	small	yes	small	yes
1825	old	small	yes	large	yes
1826	young	large	yes	small	yes
1827	young	small	yes	small	yes
1828	young	large	yes	small	yes
1829	young	small	yes	small	no
1831	young	large	yes	small	yes
1832	young	large	yes	small	yes
1833	young	large	yes	small	yes
1834	old	small	yes	small	yes
1835	young	small	yes	large	yes
1836	young	large	yes	small	yes
1837	old	large	yes	small	yes
1838	old	small	yes	small	yes
1839	young	large	yes	small	yes
1840	young	small	yes	small	yes
1841	old	small	yes	small	yes
1842	old	small	yes	large	yes
1843	young	small	yes	small	yes
1844	young	small	yes	small	yes
1845	young	small	yes	small	no
1846	young	small	yes	large	yes
1847	old	small	yes	small	yes
1848	young	small	yes	small	yes
1849	young	small	yes	small	no
1850	young	small	yes	small	yes
1851	young	small	yes	small	yes
1852	old	large	yes	small	yes
1853	young	small	yes	small	yes
1854	old	small	yes	small	no
1855	young	large	yes	small	no
1856	old	small	yes	small	yes
1857	old	small	yes	large	yes
1858	old	small	yes	large	yes
1861	young	small	yes	small	yes
1862	young	small	yes	small	yes
1863	young	small	yes	small	no
1864	old	small	yes	small	yes
1866	young	small	yes	small	yes
1868	old	small	yes	large	yes
1869	young	small	yes	large	yes
1871	old	small	yes	small	no
1873	young	small	yes	small	yes
1874	young	small	yes	small	yes
1875	old	large	yes	small	no
1876	young	small	yes	small	yes
1877	young	small	yes	large	yes
1880	young	small	yes	large	yes
1881	old	large	yes	small	yes
1882	young	small	yes	small	yes
1883	young	large	yes	small	yes
1884	young	large	yes	large	yes
1885	young	small	yes	small	yes
1886	young	small	yes	small	yes
1887	young	small	yes	small	yes
1888	young	small	yes	small	yes
1890	young	small	yes	small	yes
1891	young	small	yes	small	yes
1892	old	large	yes	small	yes
1893	young	small	yes	small	yes
1896	young	small	yes	small	yes
1897	young	small	yes	small	yes
1898	young	small	yes	small	yes
1899	old	large	yes	small	no
1900	young	small	yes	small	no
1901	old	small	yes	small	no
1902	old	small	yes	small	no
1904	young	small	yes	small	no
1906	young	small	yes	large	yes
1908	young	large	yes	small	yes
1909	young	small	yes	small	yes
1910	young	large	yes	small	no
1911	young	small	yes	small	yes
1912	young	small	yes	large	yes
1914	young	small	yes	small	yes
1915	young	large	yes	small	yes
1916	old	small	yes	large	yes
1918	old	small	yes	small	no
1919	old	small	yes	large	yes
1922	old	small	yes	small	yes
1923	young	small	yes	small	yes
1926	old	small	yes	large	yes
1927	old	small	yes	small	yes
1934	old	small	yes	small	yes
1935	young	small	yes	small	yes
1937	old	small	yes	large	yes
1938	young	small	yes	large	no
1939	young	small	yes	large	yes
1940	young	small	yes	small	yes
1941	old	small	yes	small	yes
1943	young	small	yes	small	yes
1944	young	small	yes	small	yes
1946	young	small	yes	large	yes
1947	old	large	yes	large	yes
1948	young	large	yes	small	yes
1949	young	small	yes	small	yes
1950	old	small	yes	small	yes
1951	old	large	yes	small	yes
1956	young	small	yes	large	yes
1957	young	small	yes	small	yes
1958	young	large	yes	small	yes
1959	old	small	yes	small	yes
1960	young	small	yes	large	no
1961	young	large	yes	small	yes
1962	old	small	yes	small	no
1964	old	small	yes	small	no
1966	old	small	yes	small	yes
1967	old	small	yes	small	yes
1968	old	small	yes	small	yes
1970	old	small	yes	small	yes
1971	old	small	yes	large	yes
1972	old	small	yes	large	no
1975	young	large	yes	small	no
1976	old	small	yes	large	yes
1978	old	small	yes	small	yes
1979	young	small	yes	small	yes
1980	old	small	yes	small	yes
1981	young	small	yes	small	yes
1983	young	small	yes	small	yes
1985	old	small	yes	large	yes
1989	young	small	yes	small	yes
1991	old	small	yes	small	yes
1993	young	small	yes	large	yes
1994	old	small	yes	small	yes
1995	young	large	yes	small	yes
1996	young	large	yes	small	yes
1997	young	small	yes	small	yes
1998	old	small	yes	small	yes
1999	old	small	yes	small	yes
2000	old	small	yes	small	yes
2001	old	small	yes	small	yes
2002	young	small	yes	small	yes
2003	young	small	yes	small	yes
2004	young	large	yes	small	yes
2006	old	small	yes	small	yes
2007	old	small	yes	small	yes
2008	old	small	yes	large	yes
2009	young	small	yes	large	yes
2010	old	small	yes	small	yes
2011	old	small	yes	large	yes
2013	young	small	yes	small	yes
2014	young	small	yes	small	yes
2016	old	small	yes	large	yes
2017	young	small	yes	small	yes
2019	young	large	yes	small	yes
2020	young	large	yes	large	yes
2021	old	small	yes	large	yes
2022	old	large	yes	small	yes
2023	old	small	yes	small	yes
2024	young	large	yes	small	yes
2025	old	small	yes	small	yes
2028	old	small	yes	large	yes
2029	young	small	yes	small	yes
2030	old	large	yes	small	yes
2032	old	small	yes	large	yes
2033	young	small	yes	large	yes
2034	young	large	yes	small	yes
2035	young	small	yes	large	yes
2036	young	small	yes	small	yes
2037	old	small	yes	large	yes
2038	old	small	yes	small	no
2039	old	small	yes	small	no
2041	old	small	yes	large	yes
2042	young	small	yes	small	yes
2043	young	small	yes	large	yes
2045	old	small	yes	small	no
2046	young	small	yes	small	yes
2047	old	small	yes	small	yes
2048	old	small	yes	small	yes
2049	young	small	yes	large	yes
2050	young	small	yes	small	yes
2051	old	small	yes	small	no
2052	old	small	yes	small	yes
2053	young	small	yes	small	yes
2054	old	large	yes	large	yes
2055	old	small	yes	small	yes
2056	young	small	yes	small	yes
2057	old	large	yes	large	yes
2058	young	small	yes	small	yes
2059	old	small	yes	small	yes
2060	young	small	yes	small	yes
2061	young	small	yes	large	yes
2062	young	small	yes	small	yes
2063	young	small	yes	large	yes
2064	old	small	yes	large	no
2066	old	small	yes	small	no
2067	young	small	yes	small	yes
2070	old	small	yes	small	yes
2072	young	small	yes	large	yes
2073	young	small	yes	small	no
2074	young	small	yes	small	yes
2075	old	small	yes	small	yes
2076	young	small	yes	small	yes
2077	young	small	yes	small	yes
2078	old	small	yes	small	yes
2079	young	large	yes	small	yes
2080	young	small	yes	small	yes
2081	young	small	yes	small	yes
2082	young	small	yes	small	yes
2083	young	small	yes	large	yes
2084	young	small	yes	small	yes
2087	young	small	yes	small	yes
2088	young	small	yes	large	yes
2089	old	small	yes	large	yes
2090	old	small	yes	small	no
2091	old	small	yes	small	no
2092	young	small	yes	small	yes
2093	old	small	yes	small	yes
2094	young	small	yes	small	yes
2096	old	small	yes	small	yes
2097	young	small	yes	small	yes
2099	young	small	yes	small	no
2100	young	small	yes	small	no
2102	young	small	yes	small	yes
2103	old	small	yes	small	yes
2105	old	large	yes	large	yes
2106	young	small	yes	small	yes
2108	young	small	yes	small	yes
2109	young	small	yes	small	yes
2110	old	small	yes	small	yes
2111	young	small	yes	small	yes
2112	young	small	yes	small	yes
2113	young	small	yes	small	yes
2114	young	large	yes	small	yes
2115	young	large	yes	small	yes
2116	young	large	yes	large	no
2117	young	small	yes	small	yes
2118	young	small	yes	small	yes
2120	old	small	yes	large	yes
2121	young	small	yes	large	yes
2122	young	small	yes	small	yes
2123	young	small	yes	small	yes
2124	old	large	yes	large	yes
2125	old	small	yes	large	yes
2126	young	small	yes	small	no
2127	young	small	yes	small	yes
2128	old	large	yes	small	yes
2129	young	large	yes	small	yes
2130	young	small	yes	small	yes
2131	young	large	yes	small	yes
2132	young	small	yes	small	yes
2134	young	small	yes	small	yes
2135	young	small	yes	small	yes
2136	young	small	yes	small	yes
2137	young	small	yes	small	yes
2138	young	small	yes	large	yes
2139	old	small	yes	small	no
2141	young	small	yes	small	no
2142	young	small	yes	small	yes
2143	young	small	yes	small	yes
2144	young	small	yes	small	yes
2145	young	small	yes	large	yes
2146	young	small	yes	small	yes
2147	old	small	yes	small	yes
2148	young	small	yes	small	yes
2149	young	large	yes	small	no
2150	young	small	yes	small	yes
2151	young	small	yes	large	yes
2152	old	small	yes	small	yes
2153	old	small	yes	small	yes
2154	young	small	yes	large	no
2155	old	small	yes	large	yes
2158	old	small	yes	small	yes
2159	old	small	yes	small	yes
2160	young	small	yes	small	yes
2161	old	small	yes	small	yes
2162	old	small	yes	small	yes
2164	old	small	yes	small	no
2165	young	small	yes	small	yes
2166	old	large	yes	small	yes
2167	old	small	yes	small	yes
2168	old	small	yes	small	no
2169	young	large	yes	small	no
2170	young	small	yes	small	no
2171	young	large	yes	small	no
2173	young	small	yes	small	yes
2174	young	small	yes	small	yes
2175	young	small	yes	small	yes
2176	young	small	yes	small	no
2178	old	small	yes	small	yes
2179	old	small	yes	small	yes
2180	young	small	yes	small	yes
2182	young	small	yes	small	yes
2183	young	large	yes	small	no
2184	young	small	yes	small	yes
2185	old	small	yes	small	yes
2187	old	small	yes	small	no
2188	young	small	yes	small	yes
2189	young	small	yes	small	yes
2190	young	small	yes	large	yes
2191	young	small	yes	small	yes
2192	young	small	yes	small	yes
2193	young	small	yes	small	yes
2194	young	small	yes	small	yes
2195	old	small	yes	small	yes
2198	young	large	yes	small	yes
2199	young	small	yes	small	no
2201	old	small	yes	large	no
2202	old	small	yes	small	no
2204	young	small	yes	small	yes
2205	young	large	yes	small	yes
2207	young	small	yes	small	yes
2209	young	small	yes	small	yes
2212	old	large	yes	small	yes
2214	young	small	yes	small	yes
2215	young	large	yes	small	yes
2216	young	small	yes	small	yes
2220	young	large	yes	small	yes
2221	young	small	yes	small	yes
2224	young	large	yes	small	yes
2226	young	small	yes	large	yes
2227	young	large	yes	small	yes
2228	young	small	yes	small	yes
2229	young	large	yes	small	yes
2230	young	large	yes	large	yes
2231	young	small	yes	small	yes
2233	young	small	yes	small	yes
2234	old	small	yes	small	yes
2235	old	large	yes	small	yes
2236	young	large	yes	small	yes
2237	young	large	yes	small	yes
2238	young	small	yes	small	yes
2239	young	small	yes	small	yes
2240	old	small	yes	small	yes
2241	young	small	yes	small	yes
2244	young	small	yes	small	yes
2245	young	small	yes	small	yes
2249	old	small	yes	small	yes
2250	old	small	yes	small	no
2251	young	large	yes	small	yes
2252	young	small	yes	small	yes
2254	young	large	yes	small	yes
2255	old	large	yes	large	yes
2257	young	large	yes	small	yes
2258	young	small	yes	small	no
2260	old	large	yes	small	yes
2261	old	small	yes	small	yes
2264	young	small	yes	large	yes
2265	young	large	yes	small	no
2266	young	small	yes	small	no
2267	young	small	yes	large	no
2268	young	small	yes	small	no
2270	old	small	yes	small	yes
2271	old	small	yes	small	no
2273	old	large	yes	small	yes
2274	young	large	yes	small	no
2275	young	large	yes	small	yes
2276	old	large	yes	small	yes
2277	old	small	yes	small	no
2278	old	large	yes	small	yes
2279	young	small	yes	small	yes
2280	old	small	yes	small	yes
2281	young	small	yes	small	no
2282	young	large	yes	small	yes
2284	old	large	yes	small	no
2285	old	small	yes	small	yes
2286	old	small	yes	small	yes
2287	old	small	yes	small	yes
2288	young	small	yes	small	yes
2289	old	small	yes	small	yes
2290	young	small	yes	small	yes
2291	young	large	yes	small	yes
2292	old	small	yes	small	yes
2293	young	large	no	small	yes
2294	young	small	no	small	yes
2295	young	small	yes	small	yes
2296	young	large	yes	small	yes
2297	young	small	yes	small	yes
2298	old	large	yes	large	yes
2299	young	small	yes	small	yes
2300	young	small	yes	small	yes
2301	young	large	yes	small	yes
2302	young	small	yes	small	yes
2305	young	small	yes	small	no
2306	young	large	yes	small	yes
2307	young	small	yes	small	yes
2308	old	small	yes	large	yes
2309	old	small	yes	small	no
2310	young	large	yes	small	yes
2311	old	small	yes	large	yes
2312	young	large	yes	small	yes
2314	old	small	yes	small	yes
2315	old	small	yes	small	yes
2316	old	large	yes	small	yes
2317	young	small	yes	large	yes
2318	young	large	yes	small	yes
2319	young	small	yes	small	yes
2320	young	small	yes	small	yes
2321	young	small	yes	small	yes
2322	young	small	yes	small	yes
2323	young	small	yes	small	no
2324	young	small	yes	small	yes
2325	young	small	yes	small	yes
2327	young	small	yes	small	yes
2329	young	small	yes	small	yes
2330	young	small	yes	small	yes
2331	young	small	yes	small	yes
2332	young	small	yes	small	yes
2334	old	small	yes	small	yes
2335	young	small	yes	large	yes
2336	old	small	yes	large	yes
2337	young	small	yes	small	no
2338	old	small	yes	small	yes
2341	young	small	yes	small	yes
2343	old	large	yes	small	yes
2346	young	small	no	small	yes
2347	old	small	no	small	yes
2348	young	small	no	small	yes
2350	young	small	no	small	no
2351	young	small	no	large	no
2354	young	small	no	small	yes
2355	old	small	no	small	yes
2358	old	small	no	small	yes
2361	old	small	no	small	yes
2362	young	small	no	small	no
2364	young	small	no	small	yes
2368	young	small	no	small	no
2375	young	small	no	small	yes
2380	young	small	no	small	yes
2381	young	small	no	large	yes
2384	young	small	no	small	yes
2388	old	small	no	small	yes
2389	young	small	no	small	yes
2390	young	small	no	small	no
2392	old	small	no	large	yes
2395	old	small	no	small	no
2396	young	small	no	small	yes
2398	young	small	no	small	yes
2400	old	small	no	small	yes
2401	old	small	no	small	no
2402	young	small	no	small	yes
2403	young	small	no	small	yes
2406	young	small	no	small	yes
2409	young	small	no	small	yes
2410	young	small	no	small	yes
2415	young	small	no	large	yes
2417	young	small	no	small	yes
2418	young	small	no	small	yes
2425	young	small	no	small	yes
2426	young	small	no	small	yes
2430	young	small	no	small	yes
2431	young	small	no	small	yes
2432	young	small	no	small	no
2433	young	small	no	small	no
2434	young	small	no	large	yes
2439	old	small	no	large	yes
2441	old	small	no	small	yes
2442	young	small	no	small	no
2444	young	small	no	large	yes
2445	young	small	no	small	yes
2446	old	small	no	small	yes
2449	old	large	no	small	yes
2450	young	large	no	small	no
2451	young	small	no	large	yes
2452	young	small	no	small	no
2454	young	small	no	small	yes
2455	old	small	no	small	yes
2458	young	small	no	small	no
2461	old	small	no	large	no
2464	young	small	no	small	yes
2465	young	small	no	small	yes
2467	young	small	no	small	yes
2470	old	small	no	large	yes
2471	young	small	no	small	yes
2474	old	small	no	small	yes
2475	young	small	no	small	no
2479	young	small	no	small	yes
2480	young	small	no	small	yes
2482	young	small	no	small	yes
2488	young	small	no	small	yes
2490	young	small	no	small	yes
2491	young	small	no	small	yes
2494	young	small	no	small	no
2495	young	small	no	small	no
2497	young	small	no	small	yes
2500	young	small	no	small	yes
2503	young	small	no	small	no
2504	young	small	no	large	no
2507	young	small	no	small	yes
2517	young	small	no	large	no
2518	old	small	no	small	no
2519	young	small	no	small	no
2521	young	small	no	small	no
2524	young	small	no	small	yes
2525	old	small	no	small	yes
2526	young	small	no	small	yes
2527	young	small	no	small	no
2528	young	small	no	large	no
2529	young	small	no	small	no
2530	young	small	no	small	no
2532	young	small	no	small	yes
2537	old	small	no	large	no
2538	young	small	no	large	no
2540	young	small	no	small	yes
2542	old	small	no	small	yes
2545	old	small	no	large	no
2547	young	small	no	large	yes
2548	young	small	no	small	yes
2550	young	small	no	small	no
2551	young	small	no	small	yes
2554	young	small	no	small	yes
2555	old	small	no	small	no
2557	young	small	no	small	yes
2562	young	small	no	large	yes
2563	young	small	no	small	yes
2564	young	large	no	small	yes
2566	young	small	no	small	yes
2571	young	small	no	small	yes
2573	young	small	no	small	yes
2574	young	small	no	small	yes
2578	young	small	no	small	yes
2579	young	small	no	small	no
2581	young	small	no	small	yes
2584	young	small	no	small	yes
2585	young	small	no	small	yes
2588	young	small	no	small	yes
2590	young	small	no	small	no
2591	young	small	no	small	yes
2594	young	small	no	small	yes
2598	young	large	no	large	no
2599	young	small	no	small	yes
2600	young	small	no	small	yes
2601	young	small	no	small	no
2603	young	small	no	small	yes
2605	young	small	no	small	yes
2607	young	small	no	small	yes
2608	young	small	no	small	yes
2609	young	small	no	small	no
2610	young	small	no	small	yes
2611	old	small	no	small	no
2612	young	small	no	small	yes
2613	young	large	no	small	yes
2614	young	small	no	small	yes
2615	young	small	no	small	yes
2616	young	small	no	small	yes
2617	young	small	no	large	yes
2618	young	small	no	small	yes
2619	young	small	no	small	no
2620	old	small	no	small	no
2626	young	small	no	small	no
2627	young	small	no	small	yes
2629	young	small	no	small	yes
2630	young	small	no	small	yes
2631	young	small	no	small	no
2634	young	large	no	small	no
2635	young	small	no	small	yes
2636	young	large	no	small	yes
2637	old	small	no	small	no
2638	young	small	no	small	no
2639	young	small	no	small	no
2640	young	small	no	small	yes
2641	young	small	no	small	no
2642	young	small	no	small	yes
2643	young	small	no	small	yes
2644	young	small	no	small	yes
2648	young	small	no	small	no
2650	young	small	no	small	yes
2652	young	small	no	small	yes
2654	young	small	no	large	yes
2656	young	small	no	small	yes
2657	young	small	no	small	yes
2659	young	small	yes	small	yes
2660	young	large	yes	small	no
2661	young	small	yes	small	yes
2662	young	small	yes	small	yes
2663	young	small	yes	small	yes
2667	young	small	yes	small	yes
2668	old	large	yes	small	yes
2669	young	small	yes	small	yes
2670	old	large	yes	large	yes
2671	young	large	yes	large	no
2672	old	small	yes	small	yes
2673	young	large	yes	small	yes
2674	old	small	yes	small	no
2675	old	small	yes	small	no
2677	old	large	yes	small	no
2678	young	large	yes	small	no
2679	young	small	yes	small	no
2680	old	small	yes	small	yes
2682	young	small	yes	small	yes
2683	old	large	yes	large	yes
2684	young	small	yes	small	yes
2685	young	large	yes	small	yes
2686	young	large	yes	small	yes
2687	young	small	yes	small	yes
2688	young	small	yes	small	yes
2689	old	small	yes	small	yes
2690	young	large	yes	small	yes
2691	young	small	yes	small	yes
2692	old	small	yes	small	no
2693	old	small	yes	small	no
2694	old	small	yes	large	yes
2695	young	small	yes	small	yes
2696	young	small	yes	large	yes
2697	old	small	yes	large	yes
2698	old	small	yes	small	yes
2699	young	small	yes	small	yes
2700	young	small	yes	small	yes
2701	old	small	yes	large	yes
2702	old	small	yes	small	yes
2703	old	large	yes	small	no
2704	young	small	yes	small	yes
2705	young	small	yes	large	yes
2706	old	small	yes	small	yes
2708	old	large	yes	small	yes
2709	young	small	yes	small	no
2710	old	small	yes	small	yes
2711	old	small	yes	small	no
2712	old	small	yes	small	yes
2713	old	small	yes	large	yes
2714	young	large	yes	small	yes
2715	young	small	yes	large	yes
2718	old	small	yes	large	yes
2719	old	small	yes	small	no
2720	old	small	yes	large	yes
2721	old	large	yes	small	yes
2722	young	small	yes	large	yes
2723	old	small	yes	large	yes
2724	old	small	yes	large	yes
2726	old	small	yes	small	yes
2727	old	small	yes	large	yes
2728	young	small	yes	small	yes
2729	young	small	yes	small	no
2730	old	small	yes	large	yes
2732	old	small	yes	large	yes
2733	old	small	yes	small	yes
2734	old	small	yes	large	yes
2735	young	small	yes	large	yes
2736	young	small	yes	small	yes
2737	young	small	yes	small	yes
2738	young	small	yes	small	yes
2739	old	small	yes	small	yes
2740	old	small	yes	large	yes
2741	young	small	yes	small	yes
2742	young	small	yes	small	no
2743	young	small	yes	small	no
2744	young	small	yes	small	yes
2745	old	small	yes	small	yes
2746	young	small	yes	small	no
2747	young	small	yes	large	yes
2748	old	small	yes	large	yes
2750	old	small	yes	small	yes
2751	old	small	yes	small	yes
2752	old	small	yes	small	no
2753	old	small	yes	small	yes
2754	young	small	yes	small	yes
2755	young	small	yes	large	no
2756	old	small	yes	small	yes
2757	old	small	yes	large	no
2758	old	small	yes	small	yes
2759	old	large	yes	small	no
2760	young	small	yes	small	no
2761	young	small	yes	small	yes
2763	young	large	yes	small	no
2764	young	small	yes	small	yes
2765	old	small	yes	small	yes
2767	young	small	yes	large	yes
2768	young	small	yes	large	yes
2769	old	small	yes	small	no
2770	young	large	yes	small	no
2771	young	small	yes	small	yes
2772	old	small	yes	large	yes
2773	old	small	yes	small	yes
2775	young	small	yes	small	no
2776	old	small	yes	small	yes
2777	young	large	yes	large	yes
2778	old	large	yes	small	yes
2779	old	small	yes	small	no
2780	young	small	yes	small	yes
2782	old	small	yes	small	no
2783	old	large	yes	large	yes
2784	young	small	yes	small	yes
2785	old	small	yes	small	no
2786	old	small	yes	large	yes
2787	young	small	yes	large	yes
2788	old	large	yes	small	no
2791	old	small	yes	small	yes
2792	young	large	yes	large	yes
2793	young	small	yes	large	yes
2794	old	large	yes	small	yes
2795	old	small	yes	small	yes
2796	young	large	yes	large	yes
2797	old	small	yes	small	yes
2799	old	small	yes	small	yes
2800	young	large	yes	small	yes
2801	young	small	yes	small	yes
2804	young	small	yes	small	yes
2805	young	small	yes	small	yes
2806	young	small	yes	small	yes
2807	young	small	yes	small	yes
2810	young	large	yes	small	yes
2811	old	small	yes	small	no
2812	young	large	yes	small	yes
2813	young	small	yes	small	yes
2814	young	small	yes	small	yes
2815	young	small	yes	large	no
2816	old	large	yes	large	yes
2817	young	small	yes	small	no
2818	young	small	yes	small	yes
2820	young	small	yes	small	yes
2821	old	small	yes	large	yes
2823	young	small	yes	small	yes
2824	old	small	yes	small	yes
2825	old	small	yes	small	yes
2826	young	small	yes	small	yes
2827	young	small	yes	small	yes
2828	young	small	yes	small	yes
2829	old	small	yes	small	yes
2830	old	small	yes	small	yes
2831	young	small	yes	large	yes
2833	old	small	yes	large	yes
2834	young	small	yes	small	yes
2835	old	small	yes	small	yes
2836	young	small	yes	small	yes
2837	young	small	yes	large	yes
2839	young	small	yes	small	yes
2840	young	small	yes	large	yes
2841	old	small	yes	small	yes
2842	young	large	yes	small	yes
2843	old	large	yes	small	no
2845	young	large	yes	small	yes
2846	young	small	yes	small	yes
2847	young	small	yes	small	yes
2848	young	small	yes	small	yes
2849	old	large	yes	small	yes
2850	old	large	yes	small	yes
2851	young	small	yes	large	yes
2852	old	small	yes	small	yes
2853	young	small	yes	small	no
2854	young	small	yes	small	yes
2855	old	small	yes	small	yes
2856	young	large	yes	small	yes
2857	young	large	yes	small	yes
2858	young	large	yes	small	yes
2859	young	small	yes	small	yes
2860	young	small	yes	small	yes
2861	young	small	yes	small	yes
2862	young	large	yes	small	yes
2863	young	large	yes	small	yes
2865	young	small	yes	small	yes
2866	young	small	yes	small	no
2867	old	small	yes	large	yes
2868	old	small	yes	small	yes
2869	young	small	yes	small	yes
2870	old	small	yes	small	no
2871	young	small	yes	small	yes
2872	young	large	yes	small	yes
2873	young	large	yes	small	yes
2874	old	large	yes	large	yes
2875	young	small	yes	small	yes
2876	young	small	yes	small	yes
2877	young	small	yes	small	yes
2878	young	small	yes	large	yes
2879	old	small	yes	small	yes
2880	young	small	yes	small	yes
2881	young	large	yes	small	yes
2882	young	large	yes	small	no
2883	young	small	yes	small	no
2885	young	large	yes	small	yes
2887	young	small	yes	small	yes
2888	old	large	yes	small	yes
2889	young	small	yes	small	yes
2890	old	small	yes	large	yes
2891	young	small	yes	small	yes
2892	young	small	yes	small	yes
2893	young	small	yes	small	yes
2894	young	small	yes	small	yes
2895	young	large	yes	small	yes
2896	young	small	yes	small	yes
2897	old	large	yes	small	yes
2898	old	small	yes	small	no
2899	young	small	yes	small	yes
2900	old	small	yes	small	yes
2901	young	large	yes	small	yes
2902	old	large	yes	small	yes
2903	young	small	yes	small	no
2904	young	small	yes	small	yes
2905	old	small	yes	small	yes
2906	young	small	yes	small	yes
2907	young	small	yes	small	yes
2908	young	small	yes	small	no
2909	young	small	yes	small	yes
2910	old	small	yes	small	yes
2911	young	small	yes	small	yes
2912	young	small	yes	large	yes
2913	young	small	yes	small	yes
2915	young	small	yes	small	yes
2916	young	small	yes	small	yes
2917	young	small	yes	small	no
2918	young	small	yes	small	yes
2919	old	small	yes	small	yes
2920	young	small	yes	small	no
2921	young	small	yes	large	yes
2922	young	small	yes	small	yes
2923	young	small	yes	small	yes
2924	old	small	yes	small	no
2925	young	small	yes	small	yes
[truncated: 2,298 more rows]
